# Supplementary material
Source: publisher figshare collection journal article supplement (https://gsapubs.figshare.com/articles/dataset/_/16934566)

OSU Argon Geochronology Lab  
CEOAS Oregon State University, Corvallis, USA

EXP#14D11006 > CB-6 > Sanidine > DE SILVA (12-19B)  
ARGENTINA > CAMPO PIEDRA POMEZ  
14-OSU-01 > Incremental Heating > Dan Miggins

| Information on Analysis and Constants Used in Calculations                                                                                                                                                                                                                                                                                                                                                                                                                                                                                                                                                                                                                                                                                                                                                                                                                                                                                                                                                                                                                                                                                                                                                                                                                                                                                                                                                                                                                                                                                                                                                                                                                                                    | Results                         | 40(a)/36(a) ± 2σ      | 40(r)/39(k) ± 2σ          | Age ± 2σ (Ka)                                                             | MSWD                          | 39Ar(k) (% <i>n</i> )                                                          | K/Ca ± 2σ  |
|---------------------------------------------------------------------------------------------------------------------------------------------------------------------------------------------------------------------------------------------------------------------------------------------------------------------------------------------------------------------------------------------------------------------------------------------------------------------------------------------------------------------------------------------------------------------------------------------------------------------------------------------------------------------------------------------------------------------------------------------------------------------------------------------------------------------------------------------------------------------------------------------------------------------------------------------------------------------------------------------------------------------------------------------------------------------------------------------------------------------------------------------------------------------------------------------------------------------------------------------------------------------------------------------------------------------------------------------------------------------------------------------------------------------------------------------------------------------------------------------------------------------------------------------------------------------------------------------------------------------------------------------------------------------------------------------------------------|---------------------------------|-----------------------|---------------------------|---------------------------------------------------------------------------|-------------------------------|--------------------------------------------------------------------------------|------------|
| Project = DE SILVA (12-19B)<br>Sample = CB-6<br>Material = Sanidine<br>Location = Campo Piedra Pomez<br>Region = Argentina<br>Analyst = Dan Miggins<br>Irradiation = 14-OSU-01<br>Position = X: 0   Y: 0   Z/H: 10.1 mm<br>FCT-NM Age = 28.201 ± 0.023 Ma<br>FCT-NM Reference = Kuiper et al (2008)<br>FCT-NM 40Ar/39Ar Ratio = 8.74036 ± 0.00961<br>FCT-NM J-value = 0.00179825 ± 0.00000198<br>Air Shot 40Ar/36Ar = 302.1650 ± 0.3082<br>Air Shot MDF = 0.99447850 ± 0.00063163 (LIN)<br>Experiment Type = Incremental Heating<br>Extraction Method = Single Crystal Laser Heating<br>Heating = 64 sec<br>Isolation = 1.50 min<br>Instrument = ARGUS-VI-D<br>Preferred Age = Ideogram Age<br>Age Classification = Eruption Age<br>IGSN = Undefined<br>Rock Class = Undefined<br>Lithology = Undefined<br>Lat-Lon = Undefined - Undefined<br>Age Equations = Min et al. (2000)<br>Negative Intensities = Allowed<br>Collector Calibrations = 40Ar 36Ar<br>Decay 40K = 5.530 ± 0.048 E-10 1/a<br>Decay 39Ar = 2.940 ± 0.016 E-07 1/h<br>Decay 37Ar = 8.230 ± 0.012 E-04 1/h<br>Decay 36Cl = 2.257 ± 0.015 E-06 1/a<br>Decay 40K(EC,β <sup>+</sup> ) = 0.580 ± 0.009 E-10 1/a<br>Decay 40K(β <sup>-</sup> ) = 4.950 ± 0.043 E-10 1/a<br>Atmospheric 40/36(a) = 295.50<br>Atmospheric 38/36(a) = 0.1869<br>Production 39/37(ca) = 0.0006756 ± 0.0000089<br>Production 38/37(ca) = 0.0000718 ± 0.0000092<br>Production 36/37(ca) = 0.0002663 ± 0.0000004<br>Production 40/39(k) = 0.003823 ± 0.000102<br>Production 38/39(k) = 0.012031 ± 0.000019<br>Production 36/38(cl) = 262.80 ± 1.71<br>Scaling Ratio K/Ca = 0.430<br>Abundance Ratio 40K/K = 1.1700 ± 0.0100 E-04<br>Atomic Weight K = 39.0983 ± 0.0001 g | Age Plateau<br>Error Mean       |                       | 0.01757 ± 0.00069 ± 3.91% | 57.1 ± 2.2 ± 3.91%<br>Full External Error ± 2.6<br>Analytical Error ± 2.2 | 15.94<br>0%<br>1.58<br>3.9919 | 100.00<br>25<br>2σ Confidence Limit<br>Error Magnification                     | 50.1 ± 1.8 |
|                                                                                                                                                                                                                                                                                                                                                                                                                                                                                                                                                                                                                                                                                                                                                                                                                                                                                                                                                                                                                                                                                                                                                                                                                                                                                                                                                                                                                                                                                                                                                                                                                                                                                                               | Total Fusion Age                |                       | 0.01973 ± 0.00038 ± 1.92% | 64.1 ± 1.2 ± 1.93%<br>Full External Error ± 1.9<br>Analytical Error ± 1.2 |                               | 25                                                                             | 51.2 ± 0.4 |
|                                                                                                                                                                                                                                                                                                                                                                                                                                                                                                                                                                                                                                                                                                                                                                                                                                                                                                                                                                                                                                                                                                                                                                                                                                                                                                                                                                                                                                                                                                                                                                                                                                                                                                               | Normal Isochron<br>Error Chron  | 299.58 ± 1.35 ± 0.45% | 0.01657 ± 0.00053 ± 3.21% | 53.9 ± 1.7 ± 3.22%<br>Full External Error ± 2.1<br>Analytical Error ± 1.7 | 6.24<br>0%<br>1.59<br>2.4984  | 100.00<br>25<br>2σ Confidence Limit<br>Error Magnification                     |            |
|                                                                                                                                                                                                                                                                                                                                                                                                                                                                                                                                                                                                                                                                                                                                                                                                                                                                                                                                                                                                                                                                                                                                                                                                                                                                                                                                                                                                                                                                                                                                                                                                                                                                                                               | Inverse Isochron<br>Error Chron | 299.60 ± 1.38 ± 0.46% | 0.01660 ± 0.00055 ± 3.30% | 54.0 ± 1.8 ± 3.31%<br>Full External Error ± 2.2<br>Analytical Error ± 1.8 | 6.44<br>0%<br>1.59<br>2.5377  | 100.00<br>25<br>2σ Confidence Limit<br>Error Magnification<br>Spreading Factor |            |

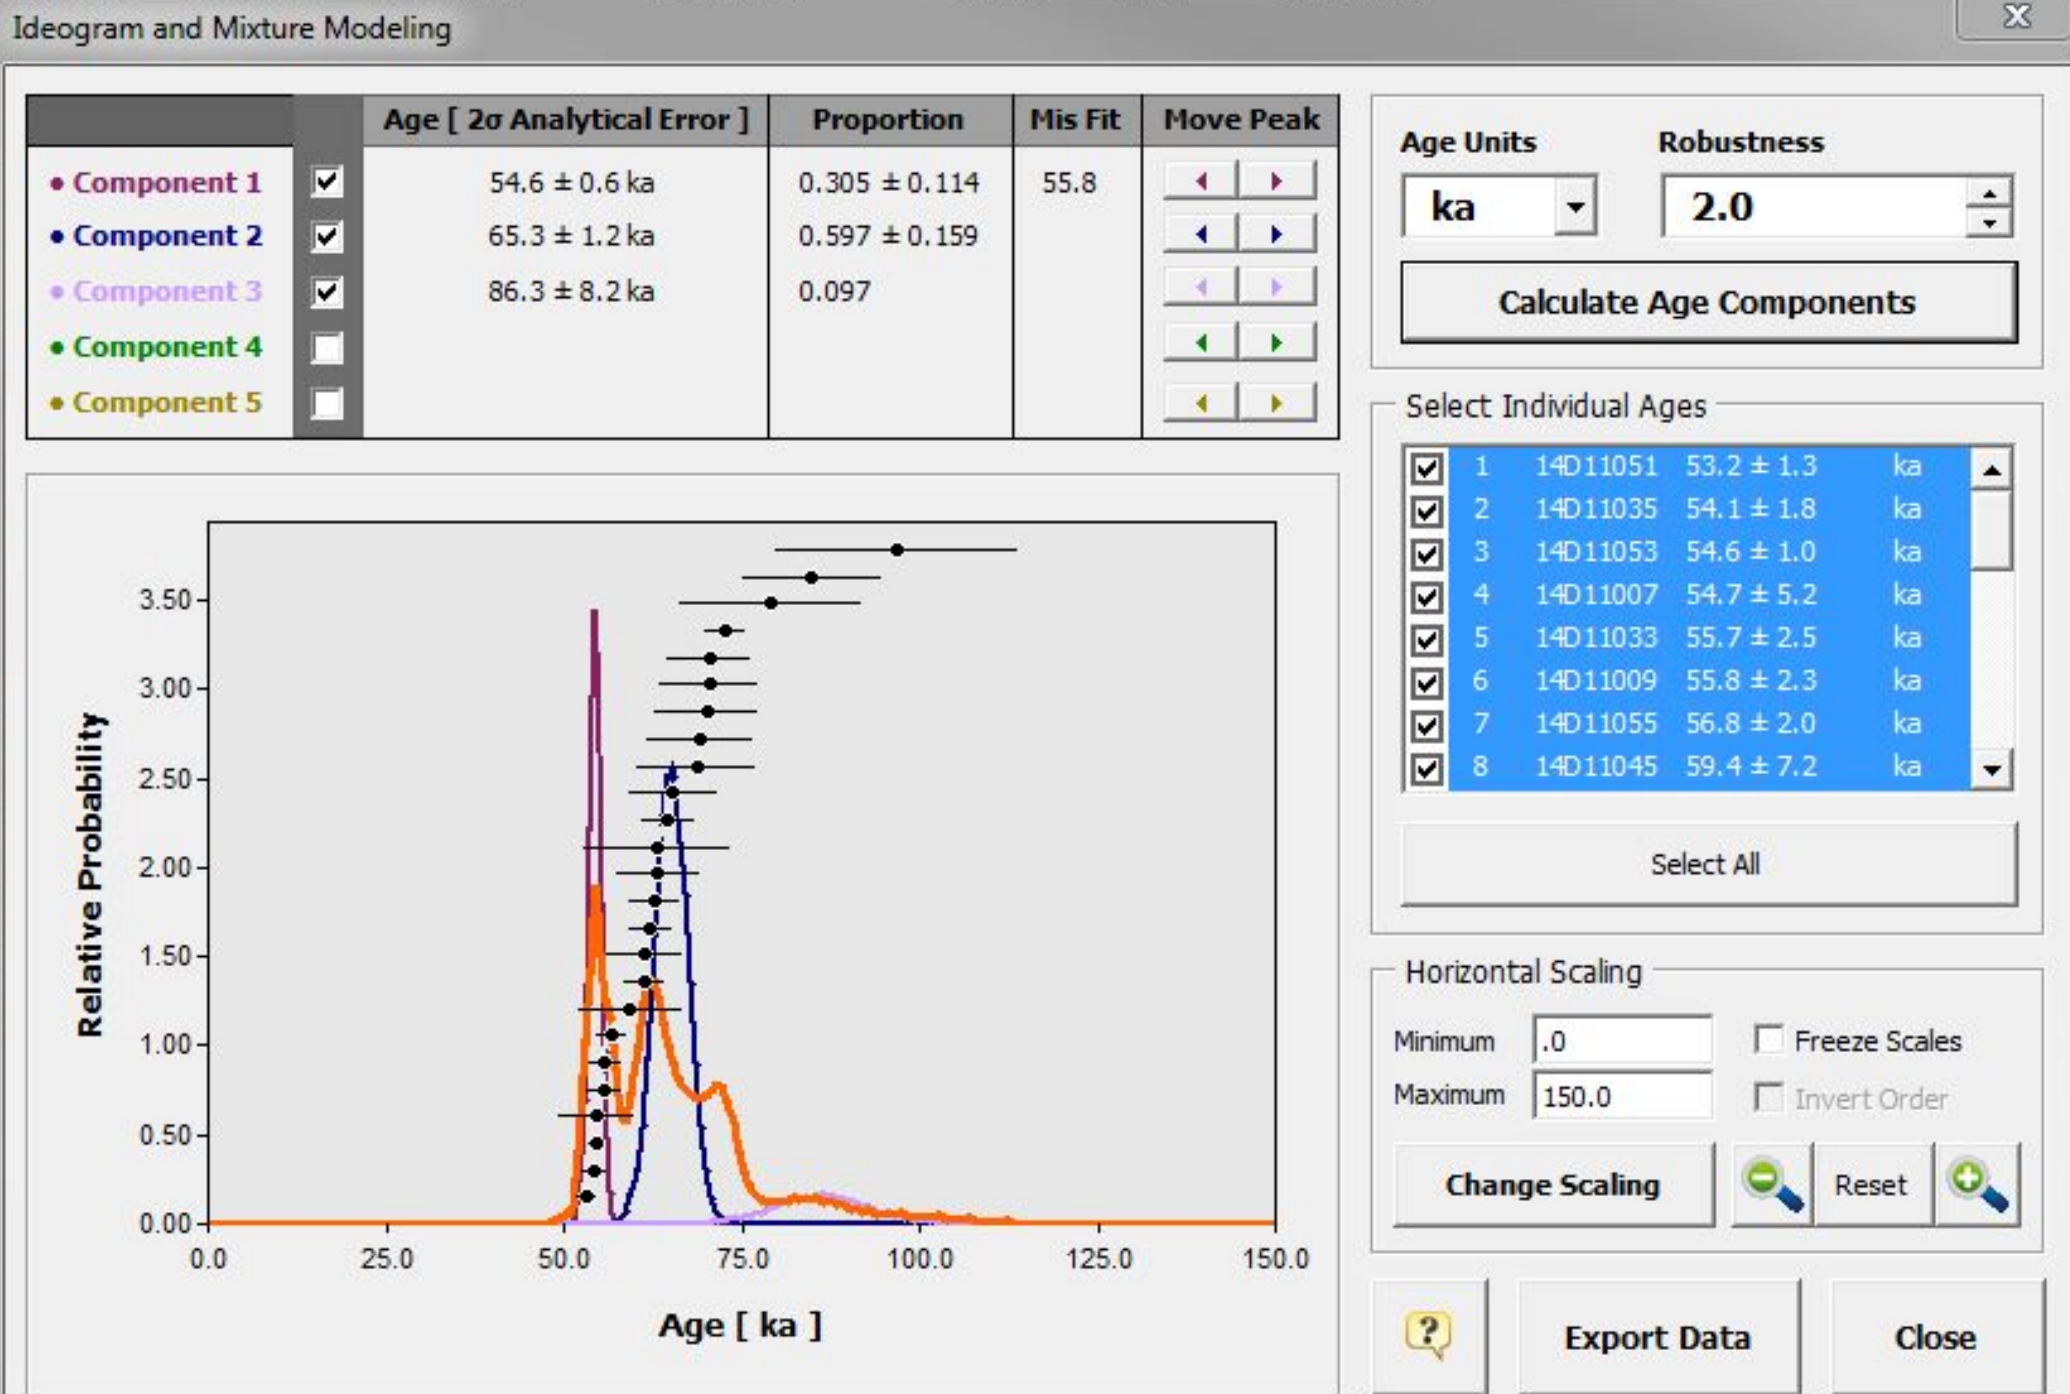

Supplement: Supplementary file 1 [file 1]
